# Supplementary material for: foxm1 Modulates Cell Non-Autonomous Response in Zebrafish Skeletal Muscle Homeostasis
Source: MDPI journal article supplement (doi:10.3390/cells10051241), 2021-05-18
Supplement: s1 [file s1]

## Supplementary Tables

**Table S1.** Oligonucleotides used for *foxm1* targeting. Target-specific sequence in capital letters. Overhangs for insertion into expression vector in lowercase letters.

| Expression vector    | Name | Sequence (5'-3') |                           |
|----------------------|------|------------------|---------------------------|
| pDR274               | 2.1  | fw               | taggGGAAGGAGTGTGGGCCTC    |
|                      |      | rv               | aaacGAGGCCCCACACTCCTTCC   |
|                      | 2.2  | fw               | taggTGTTTTTCTACAGAACTT    |
|                      |      | rv               | aaacAAGTTCTGTAGAAAAACA    |
|                      | 2.3  | fw               | taggTTTGTCTCTCCTCCAAAC    |
|                      |      | rv               | aaacGTTTGGAGGAGAGCAAAA    |
|                      | 2.4  | fw               | taggGTGTCCGGCATAGTAGGG    |
|                      |      | rv               | aaacCCCTACTATGCCGGACAC    |
|                      | 2.5  | fw               | taggGTCGAGGTGGTCTTACAG    |
|                      |      | rv               | aaacCTGTAAGACCACCTCGAC    |
|                      | 2.6  | fw               | taggGAGCAGTGGACTGGGTCG    |
|                      |      | rv               | aaacCGACCCAGTCCACTGCTC    |
|                      | 8.1  | fw               | taggGAACAGTGAAGTACCCAG    |
|                      |      | rv               | aaacCTGGGTCAGTCACTGTTC    |
|                      | 8.2  | fw               | taggGTCAGTCCGAGGCAGTAG    |
|                      |      | rv               | aaacCTACTGCCTCGGACTGAC    |
|                      | 8.3  | fw               | taggGGAAGCTGAATGGGTACC    |
|                      |      | rv               | aaacGGTACCCATTGAGCTTCC    |
|                      | GFP  | fw               | taggAGAGACCGAGAGAGGGTCTCA |
|                      |      | rv               | aaacTGAGACCCTCTCTCGGTCTCT |
| pDestTol2pA2-U6:gRNA | 8.2  | fw               | GTCAGTCCGAGGCAGTAGgt      |
|                      |      | rv               | CTACTGCCTCGGACTGACga      |

**Table S2.** Primers used in this study.

| Target locus    | Sequence (5'-3') |                              |
|-----------------|------------------|------------------------------|
| elavl3 promoter | fw               | AGTGATGATGTATAGAGTGATGTTTACG |
|                 | rv               | CTTCGATTTGCAGGTCTTCAGGC      |
| sgRNA 2.1-2.3   | fw               | CACCCTACTATGCCGGACAC         |
|                 | rv               | TAACTCACCTTTCCCAAGCTC        |
| sgRNA 2.4-2.6   | fw               | GGGAGAGCCCAAGGAGACC          |
|                 | rv               | GGCGAAACAAGTTCATCCTGC        |
| sgRNA 8.1-8.3   | fw               | AAAGCCATACCTGCATTGGGTG       |
|                 | rv               | TCATCACTTGCTTTGCCAGAATG      |
| sgRNA GFP       | fw               | GGTGGTGCCCATCCTGG            |
|                 | rv               | GCACGCCGTAGGTCAGG            |

**Table S3.** Primers used for RT-qPCR analysis.

| Target gene   | Sequence (5'-3') |                         |
|---------------|------------------|-------------------------|
| <i>foxm1</i>  | fw               | AGCAAGAGGGTCCGCATCG     |
|               | rv               | GGTCACAGGCTGAAACACAGG   |
| <i>b2m</i>    | fw               | AGGATTGTCTGCTTGGCTCTCT  |
|               | rv               | GGAGTGGAGACTTTCCCCTGTAC |
| <i>eef1a1</i> | fw               | CTTCTCAGGCTGACTGTGC     |
|               | rv               | CCGCTAGCATTACCCTCC      |
